# Supplementary material
Source: PubMed Central journal article supplement (PMC4528490)
Supplement: rstb20140292supp1.pdf [file rstb20140292supp1.pdf]

Supplementary material for Hillung J, Cuevas JM, Elena SF, 2015, Estimating the within-host fitness effects of mutations fixed during virus adaptation to different ecotypes of a new host, *Phil. Trans. R. Soc. B.* doi: 10.1098/rstb.2015.0292

| Mutation | Forward primer                                           | Reverse primer                                            |
|----------|----------------------------------------------------------|-----------------------------------------------------------|
| C795U    | 5' CGTCACATGTATGGT <u>G</u> GAGAGGAAAAGGGTG 3'           | 5' CACCCTTTTCCTCTC <u>A</u> CCATACATGTGACG 3'             |
| G1272U   | 5' GTTGAGGGTGAGTC <u>I</u> GGAGACAGTGTCAC 3'             | 5' GTGACACTGTCTCC <u>A</u> GACTCACCTCAAC 3'               |
| C2116U   | 5' CTTTTCTTIGCTCTA <u>T</u> TAGTGAATGTCAAGG 3'           | 5' CCTTGACATTCACTA <u>A</u> TAGAGCAAAGAAAATG 3'           |
| G3639A   | 5' CATCTACATGCAGAGTTT <u>A</u> GATGATTACGTTACAACC 3'     | 5' GGTTGTAACGTAATCATC <u>T</u> IAAACTCTGCATGTAGATG 3'     |
| G6420A   | 5' GAAGAAATAATGGAACACT <u>A</u> TGGTCCAATCACTACATG 3'    | 5' CATGTAGTGATTGGACCA <u>A</u> TAGTGTTCCATTATTTCTTC 3'    |
| C8636U   | 5' CTGGAAC TTCAGGAACATTCT <u>I</u> AGTTCCACGAATAAATGC 3' | 5' GCATTTATTTCGTGGA <u>A</u> CTAAGAATGTTCCCTGAAGTTCCAG 3' |
| A9240G   | 5' GTACTGCAGAGG <u>A</u> GACTGAACGG 3'                   | 5' CCGTTCAGTGTC <u>C</u> TCCTCTGCAGTAC 3'                 |

**Supplementary Table 1:** Pairs of PCR primers used for mutagenesis experiments. The mutagenized site is underlined.
